# Supplementary material for: Novel immunotherapeutic effects of topically administered ripasudil (K-115) on corneal allograft survival
Source: PubMed Central journal article supplement (PMC7666179; doi:10.1038/s41598-020-76882-w), 2020-11-13
Supplement: 41598_2020_76882_MOESM1_ESM.pdf [file 41598_2020_76882_MOESM1_ESM.pdf]

## Novel Immunotherapeutic Effects of Topically Administered Ripasudil (K-115) on

### Corneal Allograft Survival

Takenori Inomata, MD, PhD<sup>1,2,3,4,5\*</sup>, Keiichi Fujimoto, MD<sup>1,2,5</sup>, Yuichi Okumura,

MD<sup>1,2,3,5</sup>, Jun Zhu, MD<sup>1</sup>, Kenta Fujio, MD<sup>1,2,5</sup>, Hurrarnhon Shokirova, MD<sup>1</sup>, Maria

Miura, MD<sup>1,5</sup>, Mikiko Okano, MD<sup>1</sup>, Toshinari Funaki, MD, PhD<sup>1,6</sup>, Jaemyoung Sung,

MS<sup>1,7</sup>, Naoko Negishi, PhD<sup>8,9</sup>, and Akira Murakami, MD, PhD<sup>1,2,5</sup>

**Table S1. Primer sets for real-time PCR.**

| Gene                           | Forward (5' - 3')         | Reverse (5' - 3')         |
|--------------------------------|---------------------------|---------------------------|
| <i>GAPDH</i>                   | AAGGGCTCATGACCACAGTC      | GGATGACCTTGCCCACAG        |
| <i>CD11b</i>                   | CGGAAGGATTCAGCAAGCCAGAAC  | AGCTGGACTCAGCAGGCTTTAC    |
| <i>CD11c</i>                   | TTGGGTGCCCATAGAGCTGAAG    | CATTGGGTGAGTGGGTTCTGAG    |
| <i>IFN<math>\gamma</math></i>  | CGGCACAGTCATTGAAAGCC      | TGTCACCATCCTTTTGCCAGT     |
| <i>IL-10</i>                   | AGGCGCTGTCATCGATTTCT      | TGGCCTTGTAGACACCTTGG      |
| <i>IL-1<math>\beta</math></i>  | TGCCACCTTTTGACAGTGATG     | ATGTGCTGCTGCGAGATTTG      |
| <i>IL-17A</i>                  | GCAGGAGAATTGCATCCTGGTGTG  | AGGACACAAGACGTGCTTCCAG    |
| <i>IL-23A</i>                  | GACTCAAGGACAACAGCCAGTTC   | TCCTAGTAGGGAGGTGTGAAGTTG  |
| <i>IL-33</i>                   | TCCAACCTCCAAGATTTCCCCG    | CATGCAGTAGACATGGCAGAA     |
| <i>TNF-<math>\alpha</math></i> | AGCCCACGTCGTAGCAAAC       | TTTGAGATCCATGCCGTTGG      |
| <i>Cytokeratin12</i>           | CGCTGGGTCTCAGAGTGATT      | CTGACTCTGGCAGAAACGATCTTA  |
| <i>LYVE-1</i>                  | TGGGAAGAATGGCAAAGGTGTCC   | ATGCAGGAGTTAACCAGGTGTCCG  |
| <i>Pecam-1</i>                 | TTGAGCCTCACCAAGAGAACGG    | ACTCTCGCAATCCAGGAATCGG    |
| <i>VEGF-A</i>                  | TGTACCTCCACCATGCCAAGTG    | TGGGACTTCTGCTCTCCTTCTGTC  |
| <i>VEGF-C</i>                  | TCCTGGGAAATGTGCCTGTGAATG  | GCACACGGTCTTCTGTAACAACCTG |
| <i>VEGFR-1</i>                 | GAGGAGGATGAGGGTGTCTATAGGT | GTGATCAGCTCCAGGTTTGACTT   |

|                |                        |                      |
|----------------|------------------------|----------------------|
| <i>VEGFR-2</i> | GCCCTGCCTGTGGTCTCACTAC | CAAAGCATTGCCCATTCGAT |
| <i>VEGFR-3</i> | GTGCTCAAAGAGGTGACCGA   | TGAGGAGGCACATTCACCAC |

---

IFN; interferon, IL; interleukin, TNF; tumor necrosis factor, LYVE; lymphatic vessel

endothelial hyaluronan receptor, VEGF; vascular endothelial growth factor, VEGFR;

vascular endothelial growth factor receptor.
